# Supplementary material
Source: HighWire-hosted journal article supplement (http://www.qdcxjkg.com/highwire/filestream/113615/field_highwire_adjunct_files/6/tables.pdf)
Supplement: tables.pdf [file tables.pdf]

**Table e-1. General and Sleep characteristics of patients without known type 2 diabetes.**

|                                                                        | <b>Total</b><br>(n=126) | <b>OSA -</b><br>(n=39) | <b>OSA +</b><br>(n=87) | <b>P</b> |
|------------------------------------------------------------------------|-------------------------|------------------------|------------------------|----------|
| <b>Age</b> , years mean±SD                                             | 42.0 ± 10.0             | 39.0 ± 10.0            | 44.0 ± 10.0            | 0.005    |
| <b>BMI</b> , Kg/m <sup>2</sup> mean±SD                                 | 46.4 ± 6.0              | 44.7 ± 4.6             | 47.1 ± 6.4             | 0.039    |
| <b>Gender</b> , Females %                                              | 75.4                    | 74.4                   | 75.9                   | 0.856    |
| <b>Current smoking</b> , %                                             | 17.5                    | 23.1                   | 14.9                   | 0.532    |
| <b>Alcohol consumption</b> , %                                         | 5.6                     | 7.7                    | 4.6                    | 0.483    |
| <b>Body Fat</b> , % mean±SD                                            | 48.8 ± 8.3              | 47.7 ± 8.1             | 49.3 ± 8.3             | 0.324    |
| <b>WC</b> , cm mean±SD                                                 | 129.1 ± 15.7            | 123.3 ± 13.9           | 131.7 ± 15.8           | 0.005    |
| <b>Waist-Hip Ratio</b><br>mean±SD                                      | 0.92 ± 0.10             | 0.88 ± 0.08            | 0.94 ± 0.11            | 0.002    |
| <b>Neck circumference</b> , cm*                                        | 42.0 (40.0 – 44.0)      | 41.0 (39.0 – 43.0)     | 42.0 (40.0 – 46.0)     | 0.023    |
| <b>Obesity Duration</b> , years<br>mean±SD                             | 24.7 ± 10.4             | 24.0 ± 10.4            | 25.1 ± 10.4            | 0.593    |
| <b>Physical Activity</b> ,<br>METS.min.week <sup>-1</sup> ,<br>mean±SD | 2319.6 ± 2491.7         | 2352.9 ± 2443.5        | 2304.4 ± 2528.0        | 0.921    |
| <b>Glucose tolerance<br/>assessment</b> §, n (%)                       |                         |                        |                        |          |
| Diabetes                                                               | 10 (7.9 %)              | 4 (10.3 %)             | 6 (6.9 %)              | 0.588    |
| IGT                                                                    | 25 (19.8 %)             | 6 (15.4 %)             | 19 (21.8 %)            |          |
| Normal                                                                 | 82 (65.2 %)             | 26 (66.6 %)            | 56 (64.4 %)            |          |
| Missing data                                                           | 9(7.1%)                 | 3 (7.7 %)              | 6 (6.9 %)              |          |
| <b>Arterial blood gases</b><br>mean±SD                                 |                         |                        |                        |          |
| PaO <sub>2</sub> , mmHg                                                | 85.6 ± 11.3             | 88.5 ±10.5             | 84.3 ± 11.4            | 0.055    |
| PaCO <sub>2</sub> , mmHg                                               | 39.9 ± 5.0              | 39.0 ± 3.9             | 40.3 ± 5.4             | 0.146    |
| <b>Spirometry</b> , mean±SD                                            |                         |                        |                        |          |
| FVC % predicted                                                        | 99.0 ± 15.1             | 99.2 ± 13.9            | 98.8 ± 15.6            | 0.896    |
| FEV <sub>1</sub> % predicted                                           | 99.9 ± 15.2             | 98.6 ± 13.0            | 100.5 ± 16.2           | 0.519    |
| FEV <sub>1</sub> /FVC%                                                 | 81.3 ± 6.3              | 82.9 ± 6.6             | 80.6 ± 6.1             | 0.057    |
| <b>TST</b> , minutes mean±SD                                           | 353.5 ± 66.9            | 363.6 ± 50.9           | 349.0 ± 72.8           | 0.196    |
| <b>Sleep Efficiency</b> , %<br>mean±SD                                 | 76.7 ± 13.9             | 78.7 ± 10.8            | 75.9 ± 15.1            | 0.237    |
| <b>Stage I*</b> , %                                                    | 6.7 (3.8 – 11.8)        | 6.7 (4.1 – 9.6)        | 6.7 (3.6 –13.4)        | 0.952    |

|                                                              |                     |                    |                    |       |
|--------------------------------------------------------------|---------------------|--------------------|--------------------|-------|
| <b>Stage II*</b> , %                                         | 57.3 (50.0 – 65.0)  | 57.1 (49.6 – 65.0) | 57.5 (50.1 – 65.6) | 0.806 |
| <b>SWS*</b> , %                                              | 20.0 (13.4 – 28.9)  | 22.1 (13.0 – 31.3) | 19.5 (13.8 – 28.0) | 0.377 |
| <b>Stage REM*</b> , %                                        | 14.5 (9.6 – 18.3)   | 14.7 (11.5 – 18.3) | 14.0 (9.0 – 18.3)  | 0.977 |
| <b>Arousal index*</b> ,<br>number/hour                       | 21.0 (13.8 – 36.6)  | 11.2 (8.6 – 18.0)  | 26.8 (18.0 – 46.7) | 0.001 |
| <b>AHI*</b> , events/hour                                    | 30.9 (14.3 – 49.0)  | 12.2 (9.2 – 13.9)  | 39.1 (29.4 – 60.1) | 0.001 |
| <b>Time SpO<sub>2</sub> &lt;90%TST*</b> , %                  | 3.0 (0.3 – 14.0)    | 0.3 (0.0 – 1.4)    | 6.5 (1.6 – 22.9)   | 0.001 |
| <b>Self-reported sleep duration</b> , hours/night<br>mean±SD | 7.59 ± 1.59<br>1.63 | 6.92 ± 1.67        | 7.89 ± 1.47        | 0.002 |
| <b>Epworth sleepiness scale score</b> mean±SD                | 7.0 ± 5.0           | 7.0 ± 4.0          | 8.0 ± 5.0          | 0.575 |
| <b>Subjects with ESS &gt;10</b> , %                          | 27.0                | 25.6               | 27.6               | 0.820 |

Definitions of abbreviations: BMI, body mass index; WC, waist circumference; IGT, impaired glucose tolerance; PaO<sub>2</sub>, partial arterial pressure of oxygen; PaCO<sub>2</sub>, partial arterial pressure of carbon dioxide; FVC%, predicted percentage of forced vital capacity; FEV%, predicted percentage of forced expiratory volume in the first second; FEV1/FVC, FEV1/FVC ratio; TST, Total sleep time; SWS, slow-wave sleep; AHI, apnea-hypoapnea index; SpO<sub>2</sub>, arterial oxygen saturation by pulse oximetry; Time SpO<sub>2</sub> <90% TST, mean percentage of sleep time with SpO<sub>2</sub> below 90%; Subjects with EES > 10: Percentage of patients with an Epworth sleepiness scale score above 10.

Data are presented as mean ± SD, median (percentile 25 – percentile 75) and percentage for normal, non-normal (\*) distributed and categorical data, respectively.

Unpaired t-student, Mann-Whitney and chi-square test were performed on normally, skewed and categorical data, respectively.

§ Data according to Oral glucose test tolerance (OGTT) results in 117 patients.

**Table e-2. Metabolic syndrome components and others metabolic variables according to OSA categories of patients without known type 2 diabetes.**

|                                                                 | OSA -                | OSA +                 |                       |                      | p              |
|-----------------------------------------------------------------|----------------------|-----------------------|-----------------------|----------------------|----------------|
|                                                                 | AHI < 15<br>(n = 39) | AHI 15 – 30<br>(n=23) | AHI 30 – 50<br>(n=34) | AHI > 50<br>(n = 30) |                |
| <b>AHI *</b> ,<br>events/hour                                   | 12.2 (9.2 – 13.9)    | 23.2 (19.3 – 28.4)    | 36.2 (33.1 – 44.8)    | 78.2 (57.3 – 94.7)   | -              |
| <b>WC</b> , cm<br>mean±SD                                       | 123.3 ± 13.9         | 126.4 ± 12.2          | 131.7 ± 14.0          | 135.8 ± 19.3         | 0.005*         |
| <b>SBP</b> , mmHg<br>mean±SD                                    | 128.3 ± 17.1         | 131.3 ± 15.5          | 139.8 ± 17.6          | 140.7 ± 16.0         | <0.001***      |
| <b>DBP *</b> , mmHg                                             | 80.0 (60.0 – 90.0)   | 83.0 (70.0 – 90.0)    | 84.0 (80.0 – 90.0)    | 87.5 (83.0 – 90.0)   | 0.024***       |
| <b>cHDL</b> , mmol/l<br>mean±SD                                 | 1.30 ± 0.25          | 1.40 ± 0.64           | 1.23 ± 0.35           | 1.07 ± 0.24          | 0.012§         |
| <b>TG *</b> , mmol/l                                            | 1.15 (0.90 – 1.53)   | 1.21 (0.89 – 1.62)    | 1.21 (1.00 – 1.90)    | 1.50 (1.10 – 2.01)   | 0.203          |
| <b>FBG*</b> ,<br>mmol/l                                         | 5.40 (5.00 – 6.00)   | 5.40 (5.00 – 5.70)    | 5.70 (5.27 – 6.10)    | 5.60 (5.30 – 6.40)   | 0.158          |
| <b>Metabolic<br/>syndrome</b> , %                               | 33.3                 | 52.2                  | 61.8                  | 63.3                 | 0.040          |
| <b>Metabolic<br/>Index</b> , number of<br>components<br>mean±SD | 2.26 ± 1.02          | 2.52 ± 0.99           | 2.91 ± 1.08           | 3.23 ± 1.17          | 0.002*         |
| <b>Total<br/>Cholesterol</b> ,<br>mmol/l<br>mean±SD             | 5.04 ± 0.85          | 4.99 ± 1.07           | 4.88 ± 0.81           | 4.87 ± 0.97          | 0.844          |
| <b>cLDL *</b> , mmol/l                                          | 1.36 (1.15 – 3.06)   | 1.32 (1.01 – 1.80)    | 1.17 (1.05 – 1.47)    | 1.26 (0.98 – 1.54)   | 0.155          |
| <b>cVLDL *</b> ,<br>mmol/l                                      | 0.37 (0.25 – 0.66)   | 0.40 (0.23 – 0.61)    | 0.56 (0.27 – 0.65)    | 0.58 (0.34 – 0.92)   | 0.279          |
| <b>HbA1c*</b> , %                                               | 5.4 (5.0 – 5.7)      | 5.5 (5.1 – 5.8)       | 5.4 (5.2 – 5.8)       | 5.8 (5.5 – 6.4)      | 0.007***<br>¶¶ |
| <b>IGT + DM<sup>o</sup></b> ,<br>%                              | 25.6                 | 35.0                  | 23.5                  | 33.0                 | 0.594          |

Definitions of abbreviations: AHI, apnea-hipoapnea index; WC, waist circumference; SBP, systolic blood pressure; DBP, diastolic blood pressure; cHDL, high-density lipoprotein cholesterol, TG, triglycerides; FBG; fasting blood glucose; cLDL, low-density lipoprotein cholesterol; cVLDL, very low-density lipoprotein cholesterol; HbA1c, the percentage of

glycosylated hemoglobin; IGT, impaired glucose tolerance; Metabolic syndrome definition based on NCEP ATP III modified criteria (Circulation 2009; 120: 1640-1645) and metabolic index calculated as the sum of components of MetS presented in each subject divided by the number of subjects in each AHI category.

Data are presented as mean  $\pm$  SD, median (percentile 25 – percentile 75) and percentage for normal, non-normal distributed\* and categorical data, respectively.

p-value: comparisons among OSA categories. Chi-square test was used for categorical variables. ANOVA with Scheffe post-hoc analysis was used for normal continuous variables. Kruskal-Wallis test was used for not normal distributed continuous variables using Mann-Whitney test and Bonferroni correction to compare between groups.

<sup>∞</sup>: Data according to Oral glucose test tolerance (OGTT) results in 117 patients with 9 missing data (2, 3 and 4 patients from groups AHI <15, AHI 15-30 and AHI>50, respectively).

For normal data p values of intra-group tests were presented as following: \*, \*\*, §, §§ for inter-group results.

\* p<0.001 between groups: AHI <15 and AHI >50.

\*\* p<0.001 between groups: AHI <15 and AHI 30-50.

§ p<0.001 between groups: AHI 15-30 and AHI >50.

§§ p<0.001 between groups: AHI 15-30 and AHI 30-50.

¶ p<0.001 between groups: AHI <15 and AHI 15-30.

¶¶ p<0.001 between groups: AHI 30-50 and AHI >50.

**Table e-3. The association of metabolic parameters with OSA severity evaluated as AHI and Time SpO<sub>2</sub> <90% TST in patients without known type 2 diabetes.**

| <b>Dependent variable</b>                                     | <b>Adjusted <math>\beta</math> coefficient *<br/>(95% CI)</b> | <b>p</b> | <b>Adjusted <math>\beta</math> coefficient **<br/>(95% CI)</b> | <b>p</b> |
|---------------------------------------------------------------|---------------------------------------------------------------|----------|----------------------------------------------------------------|----------|
| <b>Independent variable: AHI</b>                              |                                                               |          |                                                                |          |
| <b>WC, cm</b>                                                 | 0.047 (-0.017 – 0.110)                                        | 0.146    | -                                                              | -        |
| <b>SBP, mmHg</b>                                              | 0.133 (0.025 – 0.242)                                         | 0.017    | 0.121 (0.013 – 0.23)                                           | 0.029    |
| <b>DBP, mmHg</b>                                              | 0.106 (0.006 – 0.206)                                         | 0.038    | 0.093 (-0.007 – 0.193)                                         | 0.067    |
| <b>TG, mmol/l</b>                                             | 0.004 (-0.001 – 0.009)                                        | 0.090    | 0.003 (-0.001 – 0.008)                                         | 0.153    |
| <b>cHDL, mmol/l</b>                                           | -0.003 (-0.005 – -0.000)                                      | 0.045    | -0.003 (-0.005 - 0.000)                                        | 0.041    |
| <b>FBG, mmol/l</b>                                            | 0.002 (-0.005 – 0.009)                                        | 0.548    | 0.001 (-0.005 – 0.008)                                         | 0.668    |
| <b>HbA1c, %</b>                                               | 0.006 (0.002 – 0.010)                                         | 0.006    | 0.006 (0.002 – 0.010)                                          | 0.006    |
| <b>Independent variable: Time SpO<sub>2</sub> &lt;90% TST</b> |                                                               |          |                                                                |          |
| <b>WC, cm</b>                                                 | 0.064 (-0.014 – 0.141)                                        | 0.108    | -                                                              | -        |
| <b>SBP, mmHg</b>                                              | 0.110 (-0.025 – 0.245)                                        | 0.108    | 0.093 (-0.042 – 0.228)                                         | 0.176    |
| <b>DBP, mmHg</b>                                              | -0.023 (-0.148 – 0.102)                                       | 0.713    | -0.044 (-0.168 – 0.080)                                        | 0.485    |
| <b>TG, mmol/l</b>                                             | 0.003 (-0.003 – 0.009)                                        | 0.313    | 0.002 (-0.004 – 0.008)                                         | 0.495    |
| <b>cHDL, mmol/l</b>                                           | -0.002 (-0.099 – 0.202)                                       | 0.245    | -0.002 (-0.005 - 0.001)                                        | 0.239    |
| <b>FBG, mmol/l</b>                                            | 0.052 (-0.005 – 0.009)                                        | 0.497    | 0.038 (-0.114 – 0.190)                                         | 0.624    |
| <b>HbA1c, %</b>                                               | 0.007 (0.002 – 0.012)                                         | 0.009    | 0.007 (0.002 – 0.012)                                          | 0.009    |

Definitions of abbreviations: WC, waist circumference; SBP, systolic blood pressure; DBP, diastolic blood pressure; TG, triglycerides; cHDL, high density lipoprotein cholesterol; FBG, fasting blood glucose; HbA1c, the percentage of glycosylated hemoglobin;

Data was analyzed using linear regression being the dependent variable each of metabolic parameters and the independent variable apnea-hypopnea index or Time SpO<sub>2</sub> <90%

TST. Results were expressed as unadjusted and adjusted  $\beta$  coefficient (95% confidence interval) and p-value.

\* data adjusted by age, gender, BMI and smoking

\*\* data adjusted by age, gender, waist circumference and smoking

**Table e-4. General and Sleep characteristics of the female group.**

|                                                                  | <b>Total</b><br>(n=115) | <b>IAH &lt; 15</b><br>(n=33) | <b>IAH ≥ 15</b><br>(n=82) | <b>P</b> |
|------------------------------------------------------------------|-------------------------|------------------------------|---------------------------|----------|
| <b>Age, years</b> mean±SD                                        | 44.0 ± 10.0             | 41.0 ± 10.0                  | 45.0 ± 10.0               | 0.032    |
| <b>BMI, Kg/m<sup>2</sup></b> mean±SD                             | 46.0 ± 5.3              | 44.9 ± 4.6                   | 46.5 ± 5.6                | 0.149    |
| <b>Postmenopausal state, %</b>                                   | 24.3                    | 15.2                         | 34.6                      | 0.038    |
| <b>Current smoking, %</b>                                        | 18.3                    | 27.3                         | 14.6                      | 0.147    |
| <b>Alcohol consumption, %</b>                                    | 3.5                     | 6.1                          | 2.4                       | 0.338    |
| <b>Body Fat, %</b> mean±SD                                       | 50.7 ± 7.4              | 48.0 ± 8.3                   | 51.8 ± 6.7                | 0.025    |
| <b>WC, cm</b> mean±SD                                            | 126.3 ± 14.2            | 102.6 ± 14.5                 | 128.6 ± 13.5              | 0.006    |
| <b>Waist-Hip Ratio</b> mean±SD                                   | 0.90 ± 0.08             | 0.86 ± 0.05                  | 0.92 ± 0.08               | 0.001    |
| <b>Neck circumference, cm*</b>                                   | 41.0 (39.0 – 43.0)      | 40.0 (39.0 – 42.0)           | 42.0 (40.0 – 43.5)        | 0.020    |
| <b>Obesity Duration, years</b><br>mean±SD                        | 25.5 ± 10.3             | 24.9 ± 9.3                   | 25.7 ± 10.7               | 0.045    |
| <b>Physical Activity, METS.min.week<sup>-1</sup>,</b><br>mean±SD | 2358.4 ± 2442.2         | 2103.1 ± 2411.5              | 2464.6 ± 2462.6           | 0.484    |
| <b>Glucose tolerance assessment<sup>§</sup>, n (%)</b>           |                         |                              |                           |          |
| Diabetes                                                         | 27 (23.5%)              | 7 (21.2%)                    | 20 (24.4%)                | 0.512    |
| IGT                                                              | 17 (14.8%)              | 4 (12.1%)                    | 13 (15.9%)                |          |
| Normal                                                           | 65 (56.5%)              | 20 (60.6%)                   | 45 (54.9%)                |          |
| Missing data                                                     | 6 (5.2%)                | 2 (6.1%)                     | 4 (4.8%)                  |          |
| <b>Arterial blood gases</b><br>mean±SD                           |                         |                              |                           |          |
| PaO <sub>2</sub> , mmHg                                          | 85.7 (10.5)             | 86.4 (10.2)                  | 85.5 (10.7)               | 0.693    |
| PaCO <sub>2</sub> , mmHg                                         | 39.4 (4.5)              | 38.6 (4.1)                   | 39.7 (4.7)                | 0.240    |
| <b>Spirometry, mean±SD</b>                                       |                         |                              |                           |          |
| FVC % predicted                                                  | 100.3 ± 15.1            | 95.3 ± 16.1                  | 102.3 ± 14.3              | 0.030    |
| FEV <sub>1</sub> % predicted                                     | 101.2 ± 14.8            | 96.2 ± 13.6                  | 103.2 ± 14.9              | 0.026    |
| FEV <sub>1</sub> /FVC%                                           | 81.2 ± 7.1              | 79.5 ± 6.3                   | 81.8 ± 7.2                | 0.125    |
| <b>TST, minutes</b> mean±SD                                      | 349.6 ± 65.6            | 351.7 ± 51.1                 | 348.7 ± 70.9              | 0.806    |
| <b>Sleep Efficiency, %</b><br>mean±SD                            | 75.3 ± 13.7             | 76.0 ± 12.1                  | 74.9 ± 14.4               | 0.721    |
| <b>Stage I*, %</b>                                               | 6.5 (3.8 – 11.0)        | 7.4 (5.0 – 9.5)              | 5.9 (3.5–13.4)            | 0.551    |
| <b>Stage II, %</b> mean±SD                                       | 58.6 ± 15.5             | 57.6 ± 10.3                  | 59.0 ± 17.2               | 0.657    |
| <b>SWS*, %</b>                                                   | 21.5 (14.2 – 28.9)      | 21.6 (13.4 – 30.0)           | 21.1 (15.6 – 28.9)        | 0.359    |

|                                                              |                    |                    |                    |         |
|--------------------------------------------------------------|--------------------|--------------------|--------------------|---------|
| <b>Stage REM*</b> , %                                        | 14.5 (9.3 – 19.0)  | 14.7 (11.5 – 18.3) | 14.3 (9.1 – 19.0)  | 0.588   |
| <b>Arousal index*</b> , number/hour                          | 22.7 (13.8 – 38.3) | 11.0 (8.6 – 18.0)  | 27.9 (17.4 – 45.2) | < 0.001 |
| <b>AHI*</b> , events/hour                                    | 30.8 (14.3 – 48.0) | 11.7 (7.7 – 13.6)  | 36.9 (28.9 – 56.1) | < 0.001 |
| <b>Time SpO<sub>2</sub> &lt;90%TST*</b> , %                  | 3.2 (0.4 – 13.8)   | 0.2 (0.0 – 1.1)    | 5.7 (1.5 – 16.1)   | < 0.001 |
| <b>Self-reported sleep duration</b> , hours/night<br>mean±SD | 7.61 ± 1.76        | 6.72 ± 1.74        | 7.77 ± 1.57        | 0.003   |
| <b>Epworth sleepiness scale score</b> mean±SD                | 7.0 ± 5.0          | 7.0 ± 4.0          | 7.0 ± 5.0          | 0.642   |
| <b>Subjects with ESS &gt;10</b> , %                          | 29 (25.2)          | 7 (21.2)           | 22 (26.8)          | 0.039   |

Definitions of abbreviations: BMI, body mass index; WC, waist circumference; IGT, impaired glucose tolerance; PaO<sub>2</sub>, partial arterial pressure of oxygen; PaCO<sub>2</sub>, partial arterial pressure of carbon dioxide; FVC%, predicted percentage of forced vital capacity; FEV%, predicted percentage of forced expiratory volume in the first second; FEV1/FVC, FEV1/FVC ratio; TST, Total sleep time; SWS, slow-wave sleep; AHI, apnea-hypoapnea index; SpO<sub>2</sub>, arterial oxygen saturation by pulse oximetry; Time SpO<sub>2</sub> <90% TST, mean percentage of sleep time with SpO<sub>2</sub> below 90%; Subjects with EES > 10: Percentage of patients with an Epworth sleepiness scale score above 10.

Data are presented as mean ± SD, median (percentile 25 – percentile 75) and percentage for normal, non-normal distributed (\*) and categorical data, respectively.

Unpaired t-student, Mann-Whitney and chi-square test were performed on normally, skewed and categorical data, respectively.

§ Data according to OGTT results in 89 patients and previous known diabetes in 20 patients.



**Table e- 5. The association of metabolic syndrome with obstructive sleep apnea in females**

| <b>Independent Variable</b>                                                                                                                    | <b>Unadjusted Odds Ratio (95% CI)</b> | <b>p</b> | <b>Adjusted Odds Ratio (95% CI)</b> | <b>p</b> |
|------------------------------------------------------------------------------------------------------------------------------------------------|---------------------------------------|----------|-------------------------------------|----------|
| <b>Presence of OSA</b><br>AHI $\geq$ 15 events/hour                                                                                            | 3.86 (1.64-9.08)                      | 0.002    | 2.79 (1.09-7.17)                    | 0.033    |
| Age, years                                                                                                                                     |                                       |          | 1.03 (0.97-1.10)                    | 0.319    |
| BMI, Kg/m <sup>2</sup>                                                                                                                         |                                       |          | 1.08 (0.99-1.17)                    | 0.073    |
| Postmenopausal state, %                                                                                                                        |                                       |          | 1.98 (0.51-7.65)                    | 0.322    |
| Body Fat, %                                                                                                                                    |                                       |          | 1.02 (0.96-1.09)                    | 0.490    |
| <b>Independent Variable</b>                                                                                                                    | <b>Unadjusted Odds Ratio (95% CI)</b> | <b>p</b> | <b>Adjusted Odds Ratio (95% CI)</b> | <b>p</b> |
| <b>Presence of nocturnal hypoxemia</b><br>Time SpO <sub>2</sub> <90% $\geq$ 3.30% of TST                                                       | 4.67 (2.11-10.45)                     | <0.001   | 3.90 (1.61-9.46)                    | 0.003    |
| Age, years                                                                                                                                     |                                       |          | 1.02 (0.96-1.09)                    | 0.529    |
| BMI, Kg/m <sup>2</sup>                                                                                                                         |                                       |          | 1.09 (1.00-1.19)                    | 0.056    |
| Postmenopausal state, %                                                                                                                        |                                       |          | 2.17 (0.54-8.68)                    | 0.274    |
| Body Fat, %                                                                                                                                    |                                       |          | 1.02 (0.95-1.08)                    | 0.640    |
| <b>Independent Variable</b>                                                                                                                    | <b>Unadjusted Odds Ratio (95% CI)</b> | <b>p</b> | <b>Adjusted Odds Ratio (95% CI)</b> | <b>p</b> |
| <b>Presence of OSA with significant nocturnal hypoxemia</b><br>AHI $\geq$ 15 events/hour and<br>Time SpO <sub>2</sub> <90% $\geq$ 3.30% of TST | 2.79 (1.68-4.64)                      | <0.001   | 2.47 (1.39-4.38)                    | 0.002    |
| Age, years                                                                                                                                     |                                       |          | 1.02 (0.96-1.09)                    | 0.564    |
| BMI, Kg/m <sup>2</sup>                                                                                                                         |                                       |          | 1.08 (0.99-1.18)                    | 0.073    |
| Postmenopausal state, %                                                                                                                        |                                       |          | 2.02 (0.50-8.13)                    | 0.321    |
| Body Fat, %                                                                                                                                    |                                       |          | 1.01 (0.94-1.08)                    | 0.847    |

Definitions of abbreviations: AHI, apnea-hypoapnea index; Presence of OSA defined as an AHI  $\geq 15$  events/hour; Time SpO<sub>2</sub> <90% TST, mean percentage of sleep time with SpO<sub>2</sub> below 90%; Presence of significant nocturnal hypoxemia considering values higher or equal to the median of the variable Time SpO<sub>2</sub> <90%TST; BMI, body mass index.

Data were analyzed using binary logistic regression. The presence of metabolic syndrome defined by NCEP ATP III modified criteria (Circulation 2009; 120: 1640-1645) was considered the dependent variable. Data were adjusted for age, BMI, postmenopausal state and Body Fat. Results were expressed as unadjusted and adjusted odds ratio (95% confidence interval) and p-value.
